# Supplementary material for: The Diversity of Genetic Outcomes from CRISPR/Cas Gene Editing is Regulated by the Length of the Symmetrical Donor DNA Template
Source: Genes (Basel). 2020 Sep 30;11(10):1160. doi: 10.3390/genes11101160 (PMC7599521; doi:10.3390/genes11101160)
Supplement: Supplementary file 1 [file genes-11-01160-s001.pdf]

[illegible]

NS 3' CCTAGGAGATCTCAGCTGGACGTCGCTACGTTCCAACCGTGACCGGACGAAAAATGTTGCAGCACTGACCCCTTTGGGACCGCAATGGGTTGAATTAGCG 5'

CGCCGGCG

5' TACCCGCGGATCCTTAGAGTGACCTGCAAGGCGCAAGCTTGGCACTGCGCCGCTTTTACCAACGCTGCTGACGAGGAAACCCCTTTCGCCAAGTGGCG 3'  
3' ATGGGCCCCATGAGAGATCTCAGCTGACCTCCGTACGTTTGCACCGTGACCGCAGCAAAATGTTGTCAGACTGACCCCTTTTGGGACGCAATGGTTGAATTAGCGAAGCTGTGTAGGGGAAAGCGGTGCACCGC 5'

0 15 20 25 30 35 40 45 50 55  
Met Pro Gly Asp Pro Leu Glu Ser Thr Cys Arg His Ala Ser Leu Ala Leu Ala Val Val Leu Leu Glu Arg Arg Asp Asp Thr Glu Asp Pro Gly Val Thr Thr Leu Asp Arg Leu Ala Ala His Pro Phe Ala Ser Thr Trp

Cas12a crRNA 1364

[illegible]

NS 3' **ATGCTTAAAGCTCGAACCTAGGCCCTAGAGAGATCTCTGGACGCTCGTAGCTTGCACCGTGACCGGACGAGCAAAATGTCACAGCTACGACCTTTGGAGCCCAATGGTTGAATTAGCGAAGCTGCTGTAGGAGGAAAGCGGT** 5'

1364: TS HDR-NS

**CGCCGCGC**

1GACCAATGATACGAGATCGAGCTGCGTACCGGGATCTCTAGAGTCGACTGCAAGGCTGCAAGCTTGGCACTGGCCGCTTTTACACAGCTGCTGCTGGGAAACCTCGGCTATCCCACTTAATGCTGCTGACACATCCCCCTTCGCGAGCTGGCTAATAGCAAGAGAGCGGCCCA

ACTGGTACTAATGCTTAAGCTGACGACCTAGGCCCTAGAGAGATCTGAGCTGAGCTGCTGCTAGCTTGCACCGTGACCGGACGAGCAATTTGTCACAGCTACGACCTTTGGAGCCCAATGGTTGAATTAGCGAAGCTGCTGTAGGAGGAAAGCGGTGACGCCATTAATGCTGCTCGGGGCT

get The Met Leu Thr Asn Ser Ser Ser Val Pro Gly Asp Pro Glu Gln Ser Thr Cys Arg His Ala Ser Ser Ala Leu Ala Val Val Val Gln Gln Arg Asp Asp Thr Glu Asn Pro Gly Thr Thr Gln Leu Asn Arg Leu Ala His His Pro Pro Pro Thr Ala Ser Thr Arg Asn Ser Ser Glu Ala Arg

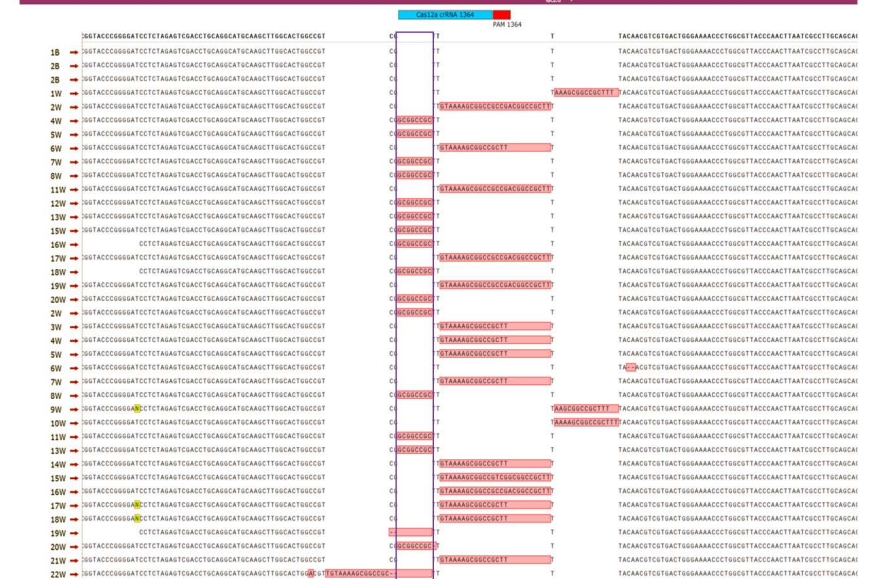

**Figure S1A-C: Additional data for Figure 3A-C - Symmetrical Homology Arm Lengths using CRISPR/Cas12a.**

Each image illustrates Cas12a in blue with the PAM site in red and a staggered red arrow indicating the 5 base, 5' overhang created after cleavage occurs. **(A-C) Additional data for Symmetrical Homology Arm Length of 20, 50, and 75 base pairs (48, 108, and 158 bases total).** The nonsense symmetrical oligonucleotide with lengths of 20, 50, or 75 base pairs on either side of the cut site is located above the *lacZ* gene, contains an eight base *NOTI* site in the center, and is positioned in a 3' to 5' orientation. The purple box highlights the correct integration of a *NOTI* site while bases highlighted in red outside of the purple box, indicate unintended integration or deletion events. The total number of colonies and the category for each event can be found in the tables located in Figure 3A-C. All blue colonies were found to harbor wild-type sequences and are represented by several blue colonies (labeled 1B and 2B) in all images.

A

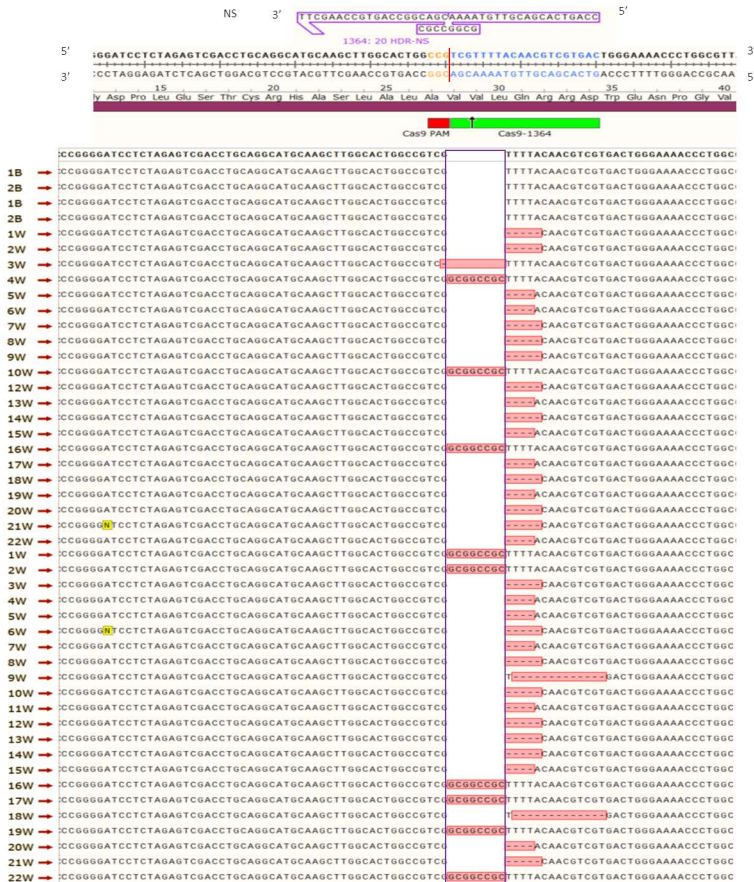

5'

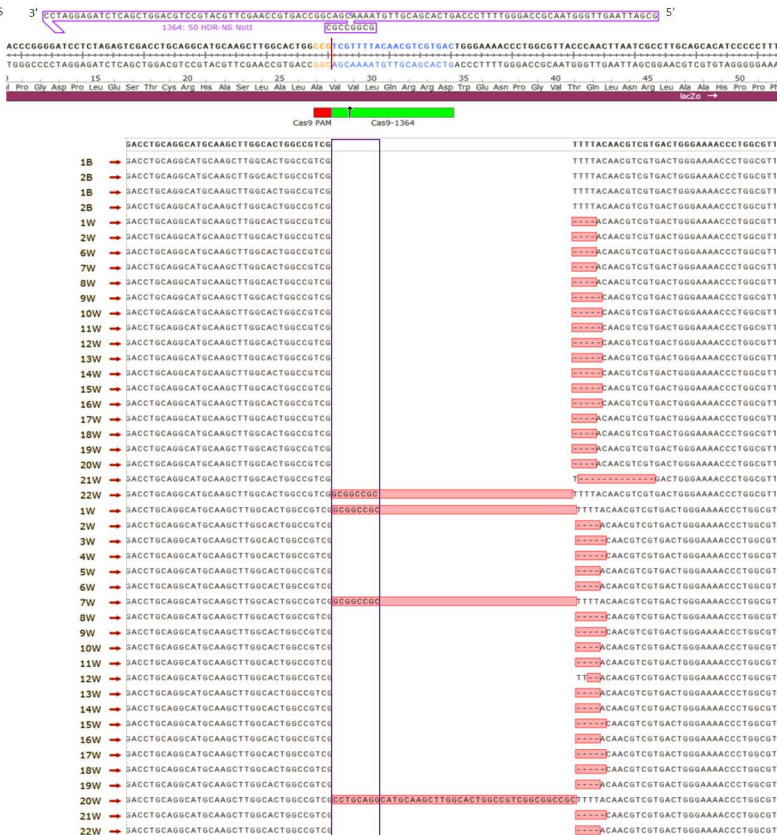

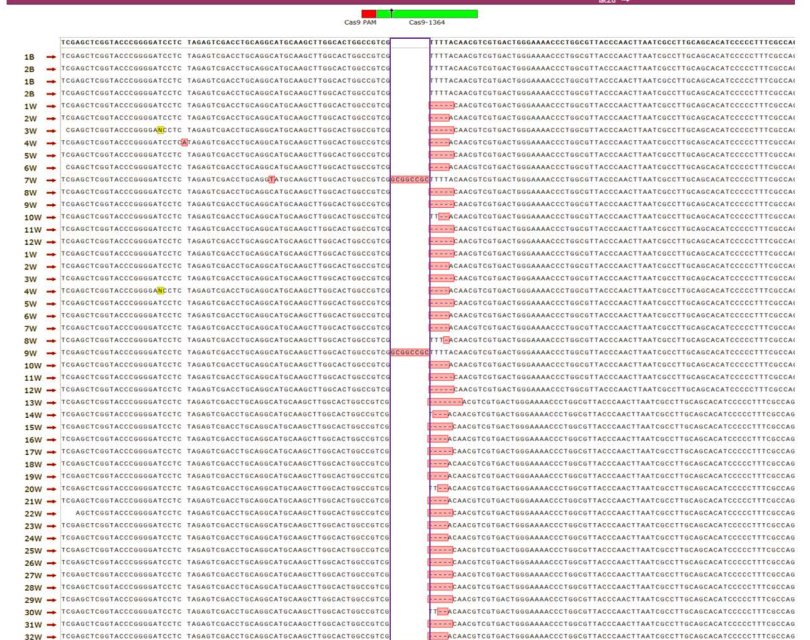

**Figure S2A-C: Additional data for Figure 4. A-C - Symmetrical Homology Arm Lengths using CRISPR/Cas9.**

**Symmetrical Homology Arm Lengths using CRISPR/Cas9.** Each image illustrates the location of Cas9 in green and the PAM site in red. A solid red line indicates the blunt ended cleavage site. **(A-C) Symmetrical Homology Arm Lengths of 20, 50, and 75 base pairs (48, 108, and 158 bases total).** The nonsense symmetrical oligonucleotide with lengths of 20, 50, or 75 base pairs on either side of the cut site is located above the *lacZ* gene, contains an eight base *NOTI* site in the center, and is positioned in a 3' to 5' orientation. The purple box highlights the correct integration of a *NOTI* site and bases highlighted in red outside of the purple box indicate unintended integration or deletion events for each image. The total number of colonies and the category for each event can be found in the tables located in Figure 4A-C. All blue colonies were found to harbor wild-type sequences and are represented by the four blue colonies (labeled 1B and 2B) in all images.

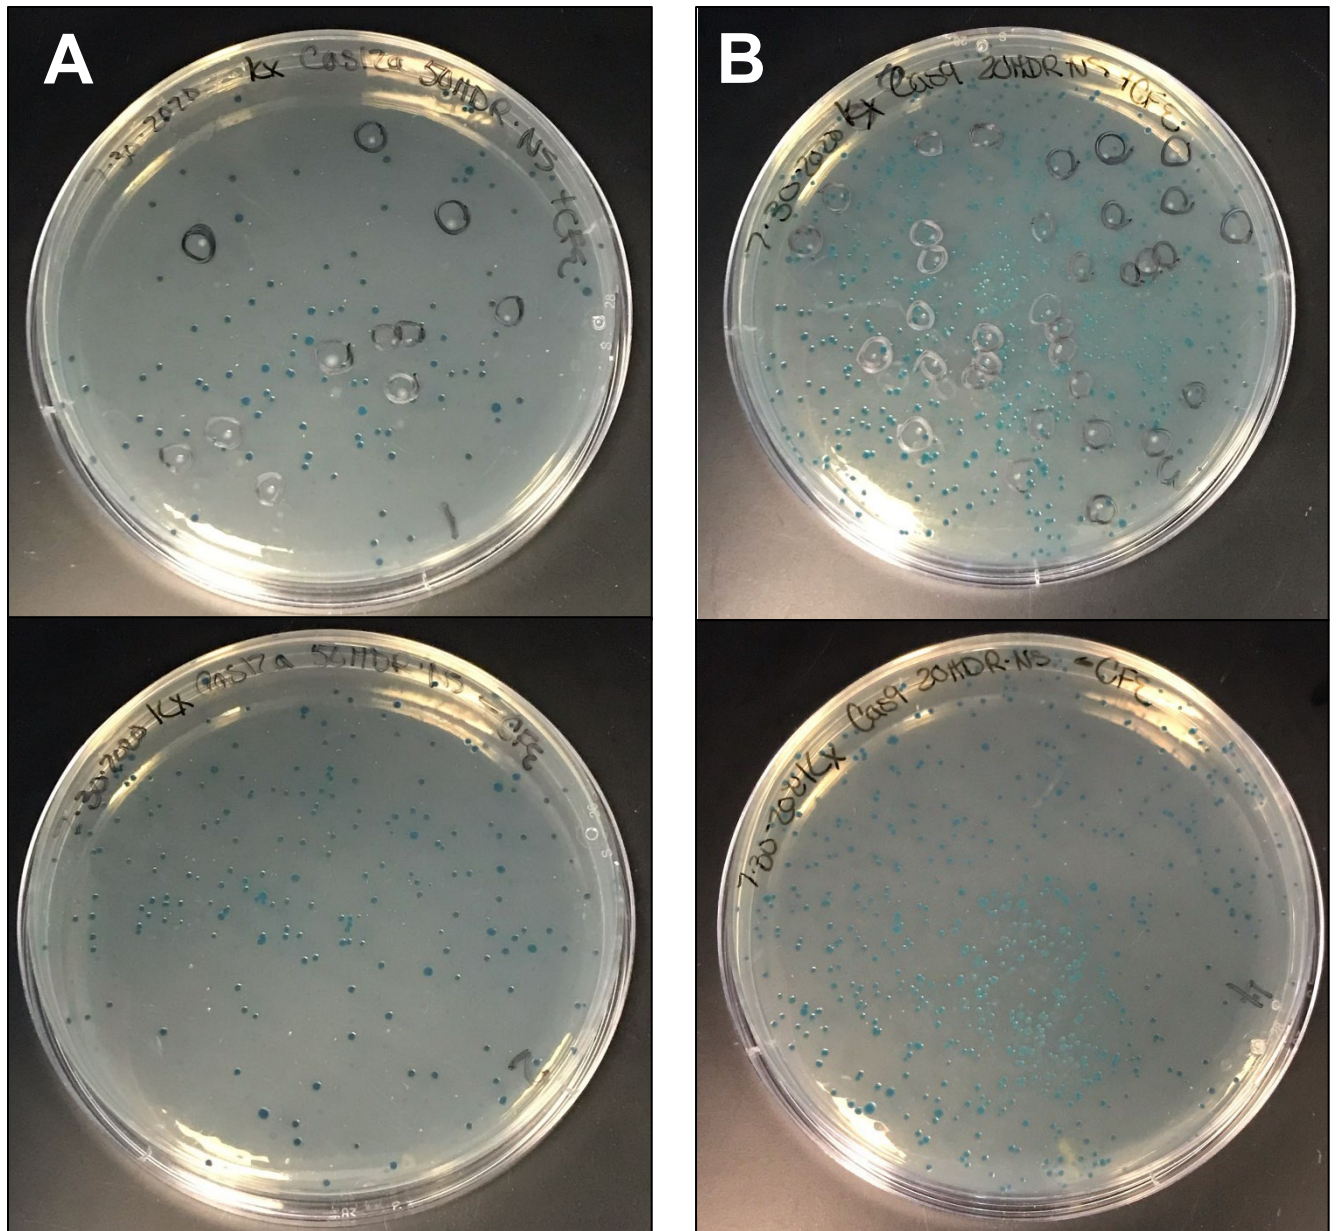

**Figure S3A-B: CRISPR/Cas control reactions with and without cell-free extract. A) Cas12a 1364 reaction with 50 base homology arm lengths. B) Cas9 1364 reaction with 20 base homology arm lengths.** The left image contains two Cas12a plates and the right image contains two Cas9 plates. The top plates for each encompass reactions with cell-free extract while the bottom plate reactions do not contain cell-free extract. The top plates for both Cas12a and Cas9 display blue and white colonies; (all white colonies are circled in black) and only blue colonies are present on the bottom plates.

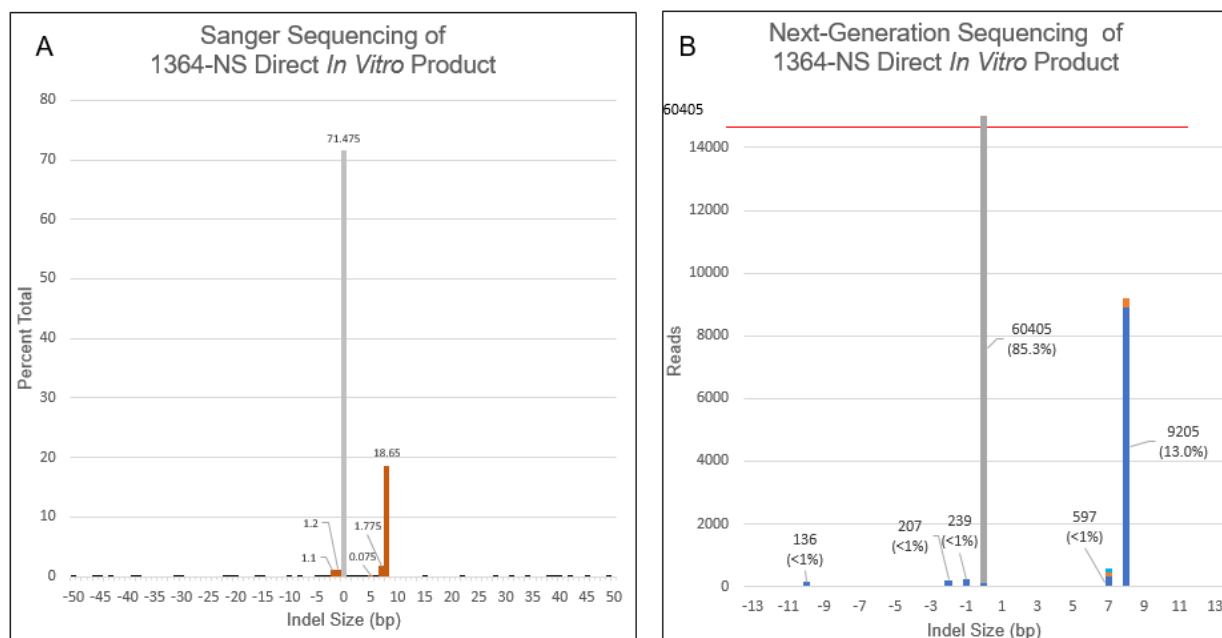

**Figure S4A-B: Comparison of Direct *In Vitro* Product Sequencing via Sanger and Next-Generation Sequencing.** For both figures, DNA was isolated and PCR-amplified directly after recircularization, with no bacterial transformation. **A)** Amplicons were sequenced via Sanger sequencing, and resultant indels were deconvoluted using TIDE. The grey bar at 0 represents wild-type, perfectly repaired sequences. Orange bars represent statistically significant indels, as determined by pearson's  $r$  via TIDE. Black bars represent non-significant background. **B)** Amplicons were sequenced via Illumina TruSeq next-generation sequencing, and resultant indels were determined using CRIS.py. Each bar consists of stacked sequences containing all sequence variations of the appropriate indel length in blue, orange, and cyan (in order of contribution percentage). The grey bar at 0 represents wild-type sequences. The horizontal orange bar represents an axis break from 14,000 to 60,405 reads.

**Table S1: Fisher's exact test comparing 20, 50, and 75 base homology arms within CRISPR/Cas12a and within CRISPR/Cas9.**

| Cas12a 20HDR-NS vs. Cas12a 50HDR-NS  |     |       |       |        | *Cas9 20HDR-NS vs. Cas9 50HDR-NS |     |       |       |        |
|--------------------------------------|-----|-------|-------|--------|----------------------------------|-----|-------|-------|--------|
|                                      | HDR | Indel | Total |        |                                  | HDR | Indel | Total |        |
| Cas12a 1364 20HDR-NS                 | 42  | 22    | 64    |        | Cas9 1364 20HDR-NS               | 20  | 41    | 61    |        |
| Cas12a 1364 50HDR-NS                 | 34  | 28    | 62    |        | Cas9 1364 50HDR-NS               | 3   | 58    | 61    |        |
| Column Totals                        | 76  | 50    | 126   |        | Column Totals                    | 23  | 99    | 122   |        |
| P-Value <0.05                        |     |       |       | 0.2748 | P-Value <0.05                    |     |       |       | 0.0001 |
| *Cas12a 20HDR-NS vs. Cas12a 75HDR-NS |     |       |       |        | *Cas9 20HDR-NS vs. Cas9 75HDR-NS |     |       |       |        |
|                                      | HDR | Indel | Total |        |                                  | HDR | Indel | Total |        |
| Cas12a 1364 20HDR-NS                 | 42  | 22    | 64    |        | Cas9 1364 20HDR-NS               | 20  | 41    | 61    |        |
| Cas12a 1364 75HDR-NS                 | 26  | 30    | 56    |        | Cas9 1364 75HDR-NS               | 2   | 61    | 63    |        |
| Column Totals                        | 68  | 52    | 120   |        | Column Total                     | 22  | 102   | 124   |        |
| P-Value <0.05                        |     |       |       | 0.0428 | P-Value <0.05                    |     |       |       | 0      |
| Cas12a 50HDR-NS vs. Cas12a 75HDR-NS  |     |       |       |        | Cas9 50HDR-NS vs. Cas9 75HDR-NS  |     |       |       |        |
|                                      | HDR | Indel | Total |        |                                  | HDR | Indel | Total |        |
| Cas12a 1364 50HDR-NS                 | 34  | 28    | 62    |        | Cas9 1364 50HDR-NS               | 3   | 58    | 61    |        |
| Cas12a 1364 75HDR-NS                 | 26  | 30    | 56    |        | Cas9 1364 75HDR-NS               | 2   | 61    | 63    |        |
| Column Totals                        | 60  | 58    | 118   |        | Column Totals                    | 5   | 119   | 124   |        |
| P-Value <0.05                        |     |       |       | 0.461  | P-Value <0.05                    |     |       |       | 0.6772 |

**Table S1: Fisher's exact test comparing 20, 50, and 75 base homology arms within CRISPR/Cas12a and within CRISPR/Cas9.** Fisher's exact test was used to compare the three lengths of homology arms within each nuclease. Statistically significant conditions within the comparisons are highlighted in red along with the associated P-value. The total number of precise HDR events and Indels are indicated along with the column totals. The P-value was set to < 0.05 for all comparisons.

**Table S2: CRISPR/Cas12a and CRISPR/Cas9 20, 50, and 75 homology arm length triplicate comparison within each nuclease.**

| Cas12a 1364 20HDR-NS |              |       |     |       |    | Cas9 1364 20HDR-NS |              |       |     |       |    |
|----------------------|--------------|-------|-----|-------|----|--------------------|--------------|-------|-----|-------|----|
| Trial                | Colony Color | Total | HDR | Indel | WT | Trial              | Colony Color | Total | HDR | Indel | WT |
| 1                    | White        | 20    | 4   | 16    | 0  | 1                  | White        | 18    | 11  | 7     | 0  |
|                      | Blue         | 19    | 0   | 0     | 19 |                    | Blue         | 20    | 0   | 0     | 20 |
| 2                    | White        | 22    | 20  | 2     | 0  | 2                  | White        | 21    | 3   | 18    | 0  |
|                      | Blue         | 2     | 0   | 0     | 2  |                    | Blue         | 2     | 0   | 0     | 2  |
| 3                    | White        | 22    | 18  | 4     | 0  | 3                  | White        | 22    | 6   | 16    | 0  |
|                      | Blue         | 2     | 0   | 0     | 2  |                    | Blue         | 2     | 0   | 0     | 2  |
| Cas12a 1364 50HDR-NS |              |       |     |       |    | Cas9 1364 50HDR-NS |              |       |     |       |    |
| Trial                | Colony Color | Total | HDR | Indel | WT | Trial              | Colony Color | Total | HDR | Indel | WT |
| 1                    | White        | 20    | 11  | 9     | 0  | 1                  | White        | 20    | 0   | 20    | 0  |
|                      | Blue         | 16    | 0   | 0     | 16 |                    | Blue         | 21    | 0   | 0     | 21 |
| 2                    | White        | 21    | 12  | 9     | 0  | 2                  | White        | 19    | 1   | 18    | 0  |
|                      | Blue         | 2     | 0   | 0     | 2  |                    | Blue         | 2     | 0   | 0     | 2  |
| 3                    | White        | 21    | 11  | 10    | 0  | 3                  | White        | 22    | 2   | 20    | 0  |
|                      | Blue         | 2     | 0   | 0     | 2  |                    | Blue         | 2     | 0   | 0     | 2  |
| Cas12a 1364 75HDR-NS |              |       |     |       |    | Cas9 1364 75HDR-NS |              |       |     |       |    |
| Trial                | Colony Color | Total | HDR | Indel | WT | Trial              | Colony Color | Total | HDR | Indel | WT |
| 1                    | White        | 20    | 10  | 10    | 0  | 1                  | White        | 19    | 1   | 18    | 0  |
|                      | Blue         | 20    | 0   | 0     | 20 |                    | Blue         | 20    | 0   | 0     | 20 |
| 2                    | White        | 16    | 10  | 6     | 0  | 2                  | White        | 12    | 0   | 12    | 0  |
|                      | Blue         | 2     | 0   | 0     | 2  |                    | Blue         | 2     | 0   | 0     | 2  |
| 3                    | White        | 20    | 6   | 14    | 0  | 3                  | White        | 32    | 1   | 31    | 0  |
|                      | Blue         | 2     | 0   | 0     | 2  |                    | Blue         | 2     | 0   | 0     | 2  |

**Table S2: CRISPR/Cas12a and CRISPR/Cas9 20, 50, and 75 homology arm length triplicate comparison within each nuclease.** The table illustrates the total number of blue and white colonies sequenced for each homology arm length experiment (20, 50, or 75) and the triplicates performed within each experiment conducted for Cas12a (left) and Cas9 (right). The table displays which colonies were found to harbor homology-directed repair, insertions or deletions (Indels), or wild-type events. All blue colonies were found to harbor wild-type sequences. Each homology arm length shows comparable numbers of both blue and white colonies for all experiments within each nuclease.
